# Supplementary material
Source: Springer Nature journal article supplement (https://www.springermedizin.de/resource/supplementary/12889_2009_1734_MOESM3_ESM.pdf/9503848)

# Percent Met Their Goal Each Week by Team Size

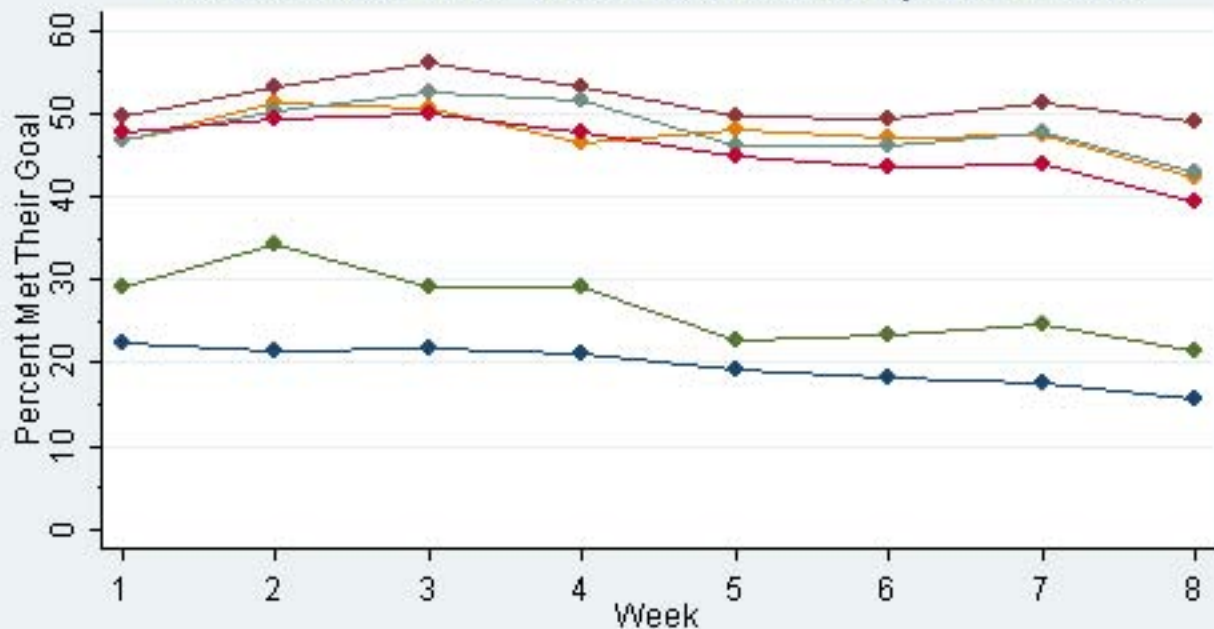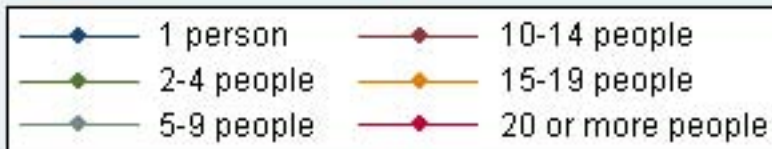

Supplement: MOESM3 [file 9503848]
